# Supplementary material
Source: PubMed Central journal article supplement (PMC6374168)
Supplement: NIHMS1516724-supplement-Supplemental_Material.pdf [file NIHMS1516724-supplement-Supplemental_Material.pdf]

## **ONLINE SUPPLEMENT**

HYPERTENSION TREATMENT RATES AND HEALTH CARE WORKER DENSITY:

AN ANALYSIS OF WORLDWIDE DATA

### **Corresponding Author:**

Rajesh Vedanthan, MD MPH

Director, Section for Global Health

Department of Population Health

New York University School of Medicine

180 Madison Avenue, 8<sup>th</sup> Floor

New York, NY 10016

Telephone: +1-646-501-3890

Email: [rajesh.vedanthan@nyulangone.org](mailto:rajesh.vedanthan@nyulangone.org)

## Supplemental Tables.

Full multivariable regression results for the four models described in the paper: total health care worker density (S1); physician density (S2); nurse density (S3); and disaggregated physician and nurse density (S4).

Full regression analyses, stratified by country-level income classification (low, lower-middle, upper-middle, high): total health care worker density (S5); physician density (S6); nurse density (S7); and disaggregated physician and nurse density (S8).

Full regression analyses, stratified by year of study (1990-1999 vs. 2000-2010): total health care worker density (S9); physician density (S10); nurse density (S11); and disaggregated physician and nurse density (S12).

S1.

| <b>Total Density (Aggregate Physician and Nurse Density); R<sup>2</sup> = 0.160</b> |                     |                |
|-------------------------------------------------------------------------------------|---------------------|----------------|
| <b>Independent Variable</b>                                                         | <b>β (CI)</b>       | <b>P-value</b> |
| Total Health Worker Density                                                         | 0.33 (-0.10, 0.76)  | 0.133          |
| GDP per Capita                                                                      | 0.36 (-0.02, 0.73)  | 0.062          |
| Land Area                                                                           | -0.04 (-0.18, 0.10) | 0.551          |
| Population                                                                          | 0.06 (-0.06, 0.19)  | 0.329          |
| 2004 DALY Estimates                                                                 | 0.12 (-0.18, 0.43)  | 0.418          |
| Hospital Beds                                                                       | -0.04 (-0.33, 0.26) | 0.796          |
| Access to an Improved Water Source                                                  | -0.10 (-0.23, 0.03) | 0.118          |
| Private (% of GDP)                                                                  | 0.05 (-0.25, 0.35)  | 0.732          |

S2.

| <b>Physician Density (separate regression); R<sup>2</sup> = 0.145</b> |                     |                |
|-----------------------------------------------------------------------|---------------------|----------------|
| <b>Independent Variable</b>                                           | <b>β (CI)</b>       | <b>P-value</b> |
| Physician Density                                                     | -0.03 (-0.36, 0.30) | 0.849          |
| GDP per Capita                                                        | 0.45 (0.09, 0.82)   | 0.016          |
| Land Area                                                             | -0.01 (-0.17, 0.14) | 0.861          |
| Population                                                            | 0.05 (-0.10, 0.21)  | 0.473          |
| 2004 DALY Estimates                                                   | 0.06 (-0.30, 0.43)  | 0.721          |
| Hospital Beds                                                         | 0.06 (-0.22, 0.34)  | 0.671          |
| Access to an Improved Water Source                                    | -0.07 (-0.21, 0.06) | 0.291          |
| Private (% of GDP)                                                    | 0.05 (-0.25, 0.34)  | 0.753          |

S3.

| <b>Nurse Density (Separate Regression); R<sup>2</sup> = 0.167</b> |                     |                |
|-------------------------------------------------------------------|---------------------|----------------|
| <b>Independent Variable</b>                                       | <b>β (CI)</b>       | <b>P-value</b> |
| Nurse Density                                                     | 0.29 (-0.01, 0.58)  | 0.055          |
| GDP per Capita                                                    | 0.35 (-0.001, 0.71) | 0.051          |
| Land Area                                                         | -0.05 (-0.19, 0.10) | 0.522          |
| Population                                                        | 0.07 (-0.06, 0.20)  | 0.261          |
| 2004 DALY Estimates                                               | 0.07 (-0.23, 0.37)  | 0.653          |
| Hospital Beds                                                     | -0.03 (-0.31, 0.25) | 0.818          |
| Access to an Improved Water Source                                | -0.12 (-0.27, 0.02) | 0.087          |
| Private (% of GDP)                                                | 0.05 (-0.24, 0.34)  | 0.717          |

S4.

| <b>Physician Density (Disaggregate)/Nurse (Disaggregate); <math>R^2 = 0.169</math></b> |                                |                |
|----------------------------------------------------------------------------------------|--------------------------------|----------------|
| <b>Independent Variable</b>                                                            | <b><math>\beta</math> (CI)</b> | <b>P-value</b> |
| Physician Density                                                                      | -0.07 (-0.41, 0.27)            | 0.678          |
| Nurse Density                                                                          | 0.30 (-0.001, 0.60)            | 0.050          |
| GDP per Capita                                                                         | 0.36 (0.001, 0.72)             | 0.049          |
| Land Area                                                                              | -0.05 (-0.20, 0.10)            | 0.521          |
| Population                                                                             | 0.08 (-0.06, 0.23)             | 0.267          |
| 2004 DALY Estimates                                                                    | 0.03 (-0.34, 0.40)             | 0.868          |
| Hospital Beds                                                                          | -0.02 (-0.30, 0.26)            | 0.879          |
| Access to an Improved Water Source                                                     | -0.13 (-0.28, 0.02)            | 0.095          |
| Private (% of GDP)                                                                     | 0.05 (-0.25, 0.34)             | 0.745          |

S5.

| Total Density (Aggregate Physician and Nurse Density) |                                              |         |                                                |         |                                                |         |                                        |         |
|-------------------------------------------------------|----------------------------------------------|---------|------------------------------------------------|---------|------------------------------------------------|---------|----------------------------------------|---------|
| Independent Variable                                  | Low-Income<br>n = 33; R <sup>2</sup> = 0.257 |         | Lower-Middle<br>n = 30; R <sup>2</sup> = 0.294 |         | Upper-Middle<br>n = 26; R <sup>2</sup> = 0.456 |         | High<br>n = 65; R <sup>2</sup> = 0.356 |         |
|                                                       | β (CI)                                       | P-value | β (CI)                                         | P-value | β (CI)                                         | P-value | β (CI)                                 | P-value |
| Total Health Worker Density                           | 0.44<br>(-0.40, 1.28)                        | 0.287   | 0.22<br>(-1.40, 1.84)                          | 0.772   | 0.03<br>(-1.18, 1.24)                          | 0.952   | 0.28<br>(-0.90, 1.47)                  | 0.627   |
| GDP per Capita                                        | 0.64<br>(-0.42, 1.70)                        | 0.221   | 0.69<br>(-0.87, 2.26)                          | 0.358   | -0.64<br>(-2.94, 1.64)                         | 0.558   | 0.82<br>(-0.09, 1.74)                  | 0.074   |
| Land Area                                             | 0.12<br>(-0.48, 0.73)                        | 0.678   | -0.23<br>(-0.60, 0.14)                         | 0.199   | 0.18<br>(-0.38, 0.74)                          | 0.511   | -0.004<br>(-0.14, 0.13)                | 0.952   |
| Population                                            | -0.14<br>(-0.60, 0.32)                       | 0.528   | 0.33<br>(-0.10, 0.76)                          | 0.120   | -0.39<br>(-0.99, 0.21)                         | 0.187   | 0.11<br>(-0.05, 0.28)                  | 0.163   |
| 2004 DALY Estimates                                   | 0.02<br>(-0.62, 0.65)                        | 0.958   | 0.45<br>(-0.32, 1.23)                          | 0.232   | -0.18<br>(-0.71, 0.35)                         | 0.480   | 0.32<br>(-0.40, 1.03)                  | 0.370   |
| Hospital Beds                                         | -0.17<br>(-0.51, 0.18)                       | 0.323   | 0.40<br>(-0.95, 1.75)                          | 0.535   | 0.60<br>(-0.25, 1.45)                          | 0.154   | -0.15<br>(-0.61, 0.31)                 | 0.511   |
| Access to an Improved Water Source                    | -0.11<br>(-0.67, 0.44)                       | 0.672   | -0.65<br>(-1.13, -0.17)                        | 0.012   | 0.12<br>(-0.32, 0.56)                          | 0.566   | -0.13<br>(-0.35, 0.10)                 | 0.251   |
| Private (% of GDP)                                    | 0.23<br>(-0.61, 1.08)                        | 0.568   | 0.06<br>(-0.79, 0.91)                          | 0.882   | 0.57<br>(-0.08, 1.23)                          | 0.081   | -0.15<br>(-0.64, 0.34)                 | 0.535   |

S6.

| <b>Physician Density (separate regression)</b> |                                                     |                |                                                       |                |                                                       |                |                                               |                |
|------------------------------------------------|-----------------------------------------------------|----------------|-------------------------------------------------------|----------------|-------------------------------------------------------|----------------|-----------------------------------------------|----------------|
| <b>Independent Variable</b>                    | <b>Low-Income<br/>n = 33; R<sup>2</sup> = 0.232</b> |                | <b>Lower-Middle<br/>n = 30; R<sup>2</sup> = 0.314</b> |                | <b>Upper-Middle<br/>n = 26; R<sup>2</sup> = 0.465</b> |                | <b>High<br/>n = 70; R<sup>2</sup> = 0.480</b> |                |
|                                                | <b>β (CI)</b>                                       | <b>P-value</b> | <b>β (CI)</b>                                         | <b>P-value</b> | <b>β (CI)</b>                                         | <b>P-value</b> | <b>β (CI)</b>                                 | <b>P-value</b> |
| Physician Density                              | -0.11<br>(-0.84, 0.62)                              | 0.752          | -0.45<br>(-1.27, 0.37)                                | 0.261          | -0.23<br>(-0.78, 0.32)                                | 0.392          | 0.27<br>(-0.77, 1.32)                         | 0.595          |
| GDP per Capita                                 | 1.01<br>(-0.04, 2.06)                               | 0.058          | 0.60<br>(-0.76, 1.96)                                 | 0.359          | -0.86<br>(-2.81, 1.10)                                | 0.367          | 1.16<br>(0.10, 2.23)                          | 0.033          |
| Land Area                                      | 0.26<br>(-0.44, 0.97)                               | 0.441          | -0.05<br>(-0.63, 0.53)                                | 0.855          | 0.22<br>(-0.26, 0.71)                                 | 0.337          | 0.08<br>(-0.11, 0.27)                         | 0.406          |
| Population                                     | -0.19<br>(-0.71, 0.32)                              | 0.446          | 0.16<br>(-0.47, 0.79)                                 | 0.598          | -0.40<br>(-0.94, 0.13)                                | 0.129          | 0.12<br>(-0.06, 0.31)                         | 0.183          |
| 2004 DALY Estimates                            | -0.17<br>(-0.94, 0.60)                              | 0.649          | 0.25<br>(-0.32, 0.82)                                 | 0.367          | -0.27<br>(-0.82, 0.29)                                | 0.325          | 0.27<br>(-0.45, 0.99)                         | 0.451          |
| Hospital Beds                                  | -0.09<br>(-0.34, 0.16)                              | 0.459          | 0.62<br>(-0.13, 1.37)                                 | 0.098          | 0.68<br>(0.07, 1.30)                                  | 0.030          | -0.21<br>(-0.64, 0.22)                        | 0.332          |
| Access to an Improved Water Source             | -0.01<br>(-0.57, 0.54)                              | 0.960          | -0.56<br>(-1.04, -0.09)                               | 0.023          | 0.17<br>(-0.15, -0.49)                                | 0.283          | -0.12<br>(-0.28, 0.04)                        | 0.144          |
| Private (% of GDP)                             | 0.32<br>(-0.47, 1.10)                               | 0.412          | 0.28<br>(-0.92, 1.50)                                 | 0.621          | 0.65<br>(-0.10, 1.39)                                 | 0.083          | -0.05<br>(-0.72, 0.62)                        | 0.887          |

S7.

| Nurse Density (Separate Regression) |                                              |         |                                                |         |                                                |         |                                        |         |
|-------------------------------------|----------------------------------------------|---------|------------------------------------------------|---------|------------------------------------------------|---------|----------------------------------------|---------|
| Independent Variable                | Low-Income<br>n = 33; R <sup>2</sup> = 0.266 |         | Lower-Middle<br>n = 30; R <sup>2</sup> = 0.310 |         | Upper-Middle<br>n = 26; R <sup>2</sup> = 0.456 |         | High<br>n = 70; R <sup>2</sup> = 0.479 |         |
|                                     | β (CI)                                       | P-value | β (CI)                                         | P-value | β (CI)                                         | P-value | β (CI)                                 | P-value |
| Nurse Density                       | 0.43<br>(-0.26, 1.12)                        | 0.209   | 0.40<br>(-0.78, 1.58)                          | 0.485   | 0.002<br>(-0.97, 1.98)                         | 0.996   | 0.16<br>(-0.58, 0.91)                  | 0.656   |
| GDP per Capita                      | 0.65<br>(-0.30, 1.60)                        | 0.169   | 0.57<br>(-1.22, 2.37)                          | 0.505   | -0.66<br>(-2.71, 1.38)                         | 0.501   | 1.00<br>(-0.004, 2.00)                 | 0.051   |
| Land Area                           | 0.10<br>(-0.46, 0.67)                        | 0.703   | -0.23<br>(-0.57, 0.10)                         | 0.161   | 0.18<br>(-0.31, 0.68)                          | 0.444   | 0.04<br>(-0.10, 0.18)                  | 0.580   |
| Population                          | -0.11<br>(-0.54, 0.32)                       | 0.584   | 0.34<br>(-0.05, 0.74)                          | 0.085   | -0.39<br>(-0.97, 0.18)                         | 0.168   | 0.12<br>(-0.04, 0.28)                  | 0.131   |
| 2004 DALY Estimates                 | -0.09<br>(-0.71, 0.53)                       | 0.767   | 0.37<br>(-0.72, 1.46)                          | 0.477   | -0.18<br>(-0.68, 0.32)                         | 0.451   | 0.24<br>(-0.45, 0.94)                  | 0.476   |
| Hospital Beds                       | -0.16<br>(-0.50, 0.17)                       | 0.318   | 0.26<br>(-1.06, 1.57)                          | 0.681   | 0.61<br>(-0.12, 1.34)                          | 0.096   | -0.25<br>(-0.70, 0.20)                 | 0.259   |
| Access to an Improved Water Source  | -0.15<br>(-0.72, 0.42)                       | 0.588   | -0.68<br>(-1.15, -0.22)                        | 0.007   | 0.13<br>(-0.26, 0.52)                          | 0.503   | -0.13<br>(-0.36, 0.11)                 | 0.272   |
| Private (% of GDP)                  | 0.24<br>(-0.57, 1.04)                        | 0.546   | 0.09<br>(-0.72, 0.89)                          | 0.486   | 0.57<br>(-0.12, 1.26)                          | 0.486   | 0.03<br>(-0.44, 0.50)                  | 0.884   |



S8.

| Physician Density (Disaggregate)/Nurse (Disaggregate) |                                              |         |                                                |         |                                                |         |                                           |         |
|-------------------------------------------------------|----------------------------------------------|---------|------------------------------------------------|---------|------------------------------------------------|---------|-------------------------------------------|---------|
| Independent Variable                                  | Low-Income<br>n = 33; R <sup>2</sup> = 0.302 |         | Lower-Middle n<br>= 30; R <sup>2</sup> = 0.371 |         | Upper-Middle<br>n = 26; R <sup>2</sup> = 0.466 |         | High<br>n = 70; R <sup>2</sup> =<br>0.330 |         |
|                                                       | $\beta$ (CI)                                 | P-value | $\beta$ (CI)                                   | P-value | $\beta$ (CI)                                   | P-value | $\beta$ (CI)                              | P-value |
| Physician Density                                     | -0.49<br>(-1.47,<br>0.48)                    | 0.307   | -0.80<br>(-1.75,<br>0.15)                      | 0.093   | -0.24<br>(-0.87,<br>0.40)                      | 0.441   | 0.40<br>(-0.83,<br>1.63)                  | 0.504   |
| Nurse Density                                         | 0.71<br>(-0.14,<br>1.57)                     | 0.097   | 0.74<br>(-0.35,<br>1.83)                       | 0.167   | 0.03<br>(-0.98,<br>1.05)                       | 0.943   | 0.27<br>(-0.58,<br>1.11)                  | 0.520   |
| GDP per Capita                                        | 0.89<br>(-0.13,<br>1.91)                     | 0.083   | 0.25<br>(-1.37,<br>1.87)                       | 0.743   | -0.85<br>(-2.90,<br>1.19)                      | 0.390   | 1.10<br>(0.02,<br>2.18)                   | 0.045   |
| Land Area                                             | 0.16<br>(-0.33,<br>0.66)                     | 0.497   | -0.02<br>(-0.54,<br>0.50)                      | 0.938   | 0.23<br>(-0.28,<br>0.73)                       | 0.354   | 0.07<br>(-0.12,<br>0.26)                  | 0.471   |
| Population                                            | -0.08<br>(-0.53,<br>0.36)                    | 0.691   | 0.16<br>(-0.35,<br>0.66)                       | 0.509   | -0.40<br>(-0.95,<br>0.14)                      | 0.138   | 0.11<br>(-0.07,<br>0.29)                  | 0.226   |
| 2004 DALY Estimates                                   | -0.49<br>(-1.46,<br>0.48)                    | 0.303   | -0.02<br>(-0.97,<br>0.94)                      | 0.973   | -0.27<br>(-0.85,<br>0.30)                      | 0.327   | 0.40<br>(-0.34,<br>1.14)                  | 0.273   |
| Hospital Beds                                         | -0.22<br>(-0.60,<br>0.16)                    | 0.246   | 0.24<br>(-0.93,<br>1.42)                       | 0.665   | 0.67<br>(-0.03,<br>1.38)                       | 0.060   | -0.15<br>(-0.60,<br>0.30)                 | 0.505   |
| Access to an Improved Water Source                    | -0.17<br>(-0.74,<br>-0.41)                   | 0.549   | -0.66<br>(-1.16,<br>-0.16)                     | 0.012   | 0.16<br>(-0.22, -<br>0.55)                     | 0.379   | -0.17<br>(-0.42,<br>0.08)                 | 0.164   |
| Private (% of GDP)                                    | 0.32<br>(-0.43,<br>1.07)                     | 0.389   | 0.42<br>(-0.58,<br>1.42)                       | 0.387   | 0.67<br>(-0.20,<br>1.54)                       | 0.120   | -0.14<br>(-0.87,<br>0.60)                 | 0.703   |

S9.

| <b>Total Density (Aggregate Physician and Nurse Density)</b> |                                                     |                |                                                    |                |
|--------------------------------------------------------------|-----------------------------------------------------|----------------|----------------------------------------------------|----------------|
| <b>Independent Variable</b>                                  | <b>2000-2010<br/>N = 108; R<sup>2</sup> = 0.223</b> |                | <b>1990-1999<br/>n = 46; R<sup>2</sup> = 0.159</b> |                |
|                                                              | <b>β (CI)</b>                                       | <b>P-value</b> | <b>β (CI)</b>                                      | <b>P-value</b> |
| Total Health Worker Density                                  | 0.45<br>(-0.09, 0.99)                               | 0.099          | -0.11<br>(-0.78, 0.57)                             | 0.742          |
| GDP per Capita                                               | 0.26<br>(-0.22, 0.74)                               | 0.277          | 0.10<br>(-0.38, 0.57)                              | 0.680          |
| Land Area                                                    | 0.03<br>(-0.19, 0.24)                               | 0.798          | -0.05<br>(-0.18, 0.09)                             | 0.477          |
| Population                                                   | -0.004<br>(-0.19, 0.18)                             | 0.969          | 0.04<br>(-0.12, 0.19)                              | 0.611          |
| 2004 DALY Estimates                                          | 0.06<br>(-0.29, 0.41)                               | 0.734          | 0.24<br>(-0.18, 0.66)                              | 0.248          |
| Hospital Beds                                                | -0.14<br>(-0.48, 0.20)                              | 0.419          | 0.42<br>(0.04, 0.81)                               | 0.033          |
| Access to an Improved Water Source                           | -0.07<br>(-0.25, 0.11)                              | 0.420          | -0.03<br>(-0.21, 0.14)                             | 0.707          |
| Private (% of GDP)                                           | 0.06<br>(-0.31, 0.44)                               | 0.732          | 0.11<br>(-0.44, 0.65)                              | 0.691          |

S10.

| <b>Physician Density (Disaggregate)/Nurse (Disaggregate)</b> |                                                     |                |                                                    |                |
|--------------------------------------------------------------|-----------------------------------------------------|----------------|----------------------------------------------------|----------------|
| <b>Independent Variable</b>                                  | <b>2000-2010<br/>N = 108; R<sup>2</sup> = 0.244</b> |                | <b>1990-1999<br/>n = 46; R<sup>2</sup> = 0.185</b> |                |
|                                                              | <b>β (CI)</b>                                       | <b>P-value</b> | <b>β (CI)</b>                                      | <b>P-value</b> |
| Physician Density                                            | -0.12<br>(-0.52,<br>0.27)                           | 0.543          | -0.30<br>(-0.71,<br>0.11)                          | 0.142          |
| Nurse Density                                                | 0.42<br>(0.05,<br>0.80)                             | 0.028          | 0.07<br>(-0.43,<br>0.58)                           | 0.768          |
| GDP per Capita                                               | 0.27<br>(-0.20,<br>0.74)                            | 0.257          | 0.02<br>(-0.44,<br>0.48)                           | 0.920          |
| Land Area                                                    | 0.03<br>(-0.20,<br>0.26)                            | 0.782          | -0.06<br>(-0.20,<br>0.07)                          | 0.318          |
| Population                                                   | 0.02<br>(-0.20,<br>0.23)                            | 0.863          | 0.06<br>(-0.09,<br>0.21)                           | 0.446          |
| 2004 DALY Estimates                                          | -0.08<br>(-0.50,<br>0.33)                           | 0.688          | 0.14<br>(-0.32,<br>0.59)                           | 0.545          |
| Hospital Beds                                                | -0.12<br>(-0.44,<br>0.21)                           | 0.475          | 0.46<br>(0.06,<br>0.86)                            | 0.026          |
| Access to an Improved Water Source                           | -0.10<br>(-0.31,<br>0.10)                           | 0.318          | -0.06<br>(-0.26,<br>0.14)                          | 0.560          |
| Private (% of GDP)                                           | 0.06<br>(-0.31,<br>0.43)                            | 0.747          | 0.13<br>(-0.42,<br>0.67)                           | 0.638          |

S11.

| <b>Physician Density (separate regression)</b> |                                                     |                |                                                    |                |
|------------------------------------------------|-----------------------------------------------------|----------------|----------------------------------------------------|----------------|
| <b>Independent Variable</b>                    | <b>2000-2010<br/>N = 108; R<sup>2</sup> = 0.200</b> |                | <b>1990-1999<br/>n = 46; R<sup>2</sup> = 0.183</b> |                |
|                                                | <b>β (CI)</b>                                       | <b>P-value</b> | <b>β (CI)</b>                                      | <b>P-value</b> |
| Physician Density                              | -0.09<br>(-0.48, 0.30)                              | 0.645          | -0.28<br>(-0.72, 0.17)                             | 0.212          |
| GDP per Capita                                 | 0.41<br>(-0.08, 0.89)                               | 0.098          | 0.06<br>(-0.38, 0.50)                              | 0.778          |
| Land Area                                      | 0.07<br>(-0.17, 0.32)                               | 0.544          | -0.06<br>(-0.16, 0.05)                             | 0.292          |
| Population                                     | -0.01<br>(-0.25, 0.22)                              | 0.899          | 0.05<br>(-0.09, 0.19)                              | 0.464          |
| 2004 DALY Estimates                            | -0.03<br>(-0.45, 0.38)                              | 0.879          | 0.15<br>(-0.28, 0.58)                              | 0.468          |
| Hospital Beds                                  | 0.003<br>(-0.34, 0.34)                              | 0.985          | 0.47<br>(0.10, 0.84)                               | 0.014          |
| Access to an Improved Water Source             | -0.02<br>(-0.20, 0.17)                              | 0.866          | -0.05<br>(-0.23, 0.13)                             | 0.574          |
| Private (% of GDP)                             | 0.07<br>(-0.29, 0.42)                               | 0.701          | 0.12<br>(-0.42, 0.65)                              | 0.653          |

S12.

| <b>Nurse Density (Separate Regression)</b> |                                                     |                |                                                    |                |
|--------------------------------------------|-----------------------------------------------------|----------------|----------------------------------------------------|----------------|
| <b>Independent Variable</b>                | <b>2000-2010<br/>N = 108; R<sup>2</sup> = 0.240</b> |                | <b>1990-1999<br/>n = 46; R<sup>2</sup> = 0.156</b> |                |
|                                            | <b>β (CI)</b>                                       | <b>P-value</b> | <b>β (CI)</b>                                      | <b>P-value</b> |
| Nurse Density                              | 0.41<br>(0.04,<br>0.78)                             | 0.029          | -0.04<br>(-0.59,<br>0.50)                          | 0.874          |
| GDP per Capita                             | 0.25<br>(-0.20,<br>0.70)                            | 0.273          | 0.08<br>(-0.37,<br>0.54)                           | 0.711          |
| Land Area                                  | 0.03<br>(-0.19,<br>0.25)                            | 0.793          | -0.05<br>(-0.19,<br>0.09)                          | 0.458          |
| Population                                 | 0.01<br>(-0.19,<br>0.20)                            | 0.941          | 0.04<br>(-0.12,<br>0.20)                           | 0.607          |
| 2004 DALY Estimates                        | -0.02<br>(-0.36,<br>0.32)                           | 0.908          | 0.26<br>(-0.17,<br>0.69)                           | 0.233          |
| Hospital Beds                              | -0.13<br>(-0.46,<br>0.20)                           | 0.419          | 0.41<br>(0.03,<br>0.79)                            | 0.036          |
| Access to an Improved Water Source         | -0.10<br>(-0.30,<br>0.10)                           | 0.311          | -0.03<br>(-0.23,<br>0.16)                          | 0.727          |
| Private (% of GDP)                         | 0.07<br>(-0.30,<br>0.43)                            | 0.712          | 0.11<br>(-0.43,<br>0.65)                           | 0.684          |

## Supplemental Figure.

S1.

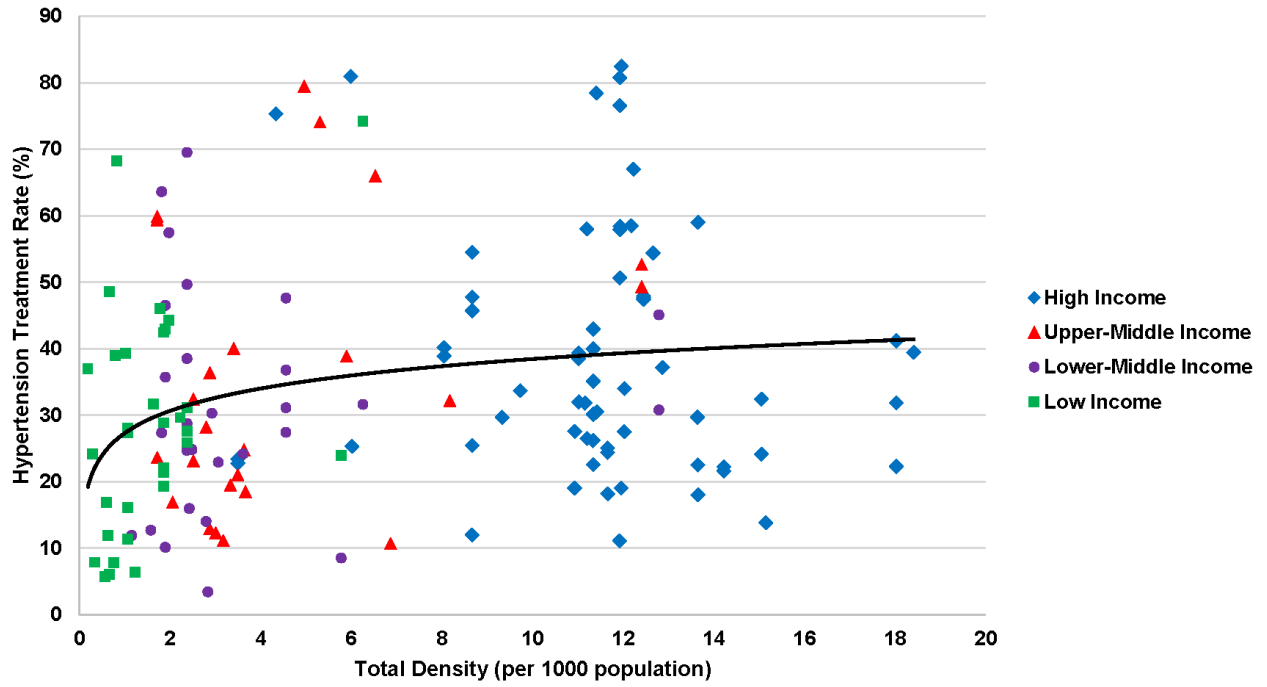

Relationship between total health care worker density and hypertension treatment rates worldwide, with countries of different income classification indicated. Solid curve is derived from the fully adjusted model.
